# Supplementary material for: Mites Living in the Nests of the White Stork and Black Stork in Microhabitats of the Forest Environment and Agrocenoses
Source: MDPI journal article supplement (doi:10.3390/ani13203189), 2023-10-12
Supplement: s1 [file s1]

## Supplementary Materials

**Table S1.** List of Oribatida taxons and their preferences, found in the nests of the White Stork and the nests of the Black Stork.

| Taxon                                                |             | Habitat Preferences<br>[95,96,99]  | Dietary preferences<br>[95,96] | Prevalence<br>[95,97,101,102] | Reproduction<br>[98-100] |
|------------------------------------------------------|-------------|------------------------------------|--------------------------------|-------------------------------|--------------------------|
| White Stork                                          | Black Stork |                                    |                                |                               |                          |
| <i>Scheloribates laevigatus</i> (C. L. Koch, 1835)   |             | Eur <sup>1</sup> , Mea             | Pan <sup>2</sup> , Cop         | Hol <sup>3</sup>              | S <sup>4</sup>           |
| <i>Ramusella fasciata</i> (Paoli, 1908)              |             | nd. <sup>5</sup>                   | nd.                            | Hol                           | nd.                      |
| <i>Punctoribates punctum</i> (C.L. Koch, 1839)       |             | Eur, Wood, Arb, Mos,<br>Gras, Mes  | Pan                            | Cosm                          | S                        |
| <i>Tectocephus velatus</i> (Michael, 1880)           |             | Eur                                | Mic                            | Cosm                          | P                        |
| <i>Oribatula exilis</i> (Nicolet, 1855)              |             | Eur, Arb, Mos, Xer                 | Mic                            | Hol                           | S                        |
| <i>Liebstadia similis</i> (Michael 1888)             |             | Wood, Gras, Hyg                    | Pan                            | Hol                           | nd.                      |
| <i>Oppia denticulata</i> (Canestrini, 1882)          |             | Eur                                | nd.                            | Pal                           | nd.                      |
| <i>Oribatula pannonica</i><br>(Willmann, 1949)       |             | Xer, Mos, Hal                      | Mic                            | Euro                          | S                        |
| <i>Trichoribates trimaculatus</i> (C. L. Koch, 1835) |             | Arb, Mos, Gras, Xer                | Pan                            | Hol                           | nd.                      |
| <i>Eupelops occultus</i> (C. L. Koch, 1835)          |             | Gras, Tyr                          | Pan                            | Pal                           | S                        |
| <i>Galumna obvia</i> (Berlese, 1915)                 |             | Gras                               | Pan                            | Hol                           | S                        |
| <i>Achipteria nitens</i> (Nicolet, 1855)             |             | Wood, Mpl                          | Pan                            | Pal                           | S                        |
| <i>Achipteria coleoptrata</i> (Linné, 1758)          |             | Eur, Wood                          | Mac, Pan                       | Hol                           | S                        |
| <i>Platynothrus peltifer</i> (C.L. Koch, 1839)       |             | Eur, Wood, Arb, Pem,<br>Hyg, Gras, | Pan                            | Cosm                          | P                        |
| <i>Scheloribates pallidulus</i><br>(C.L. Koch, 1841) |             | Eur, Wood, Gras, Pem,<br>Hyg       | Pan                            | Cosm                          | S                        |
| <i>Tectoribates ornatus</i><br>(Schuster, 1958)      |             | Xer, Gras, Hal                     | Mic                            | Pal                           | nd.                      |
| <i>Trichoribates incisellus</i><br>(Kramer, 1897)    |             | Gras, Hal                          | Pan                            | Pal                           | nd.                      |
| <i>Pergalumna nervosa</i> (Berlese, 1914)            |             | Eur, Wood, Hyg, Gras,<br>Pem, Xer  | Pan                            | Cosm                          | S                        |
| <i>Chamobates cuspidatus</i> (Michael, 1884)         |             | Wood, Tyr                          | Pan                            | Hol                           | nd.                      |
| <i>Neoribates aurantiacus</i><br>(Oudemans, 1914)    |             | Wood, Gras                         | nd.                            | Hol                           | nd.                      |
| <i>Diapterobates humeralis</i><br>(Hermann, 1804)    |             | Wood, Arb, Gras, Xer               | Mic                            | Hol                           | S                        |
| <i>Eupelops subuliger</i><br>(Berlese, 1916)         |             | Wood, Hig                          | nd.                            | Euro                          | S                        |
| <i>Oppiella nova</i> (Oudemans, 1902)                |             | Eur                                | Mic                            | Cosm                          | P                        |

|                                                               |                                                        |                              |          |      |     |
|---------------------------------------------------------------|--------------------------------------------------------|------------------------------|----------|------|-----|
| <i>Eniochtchoni</i><br><i>minutissimus</i> (Berlese,<br>1903) |                                                        | Eur, Wood                    | Mic      | Cosm | P   |
| <i>Ceratozetes gracillis</i><br>(Michael, 1884)               |                                                        | Wood, Moo                    | Pan      | Hol  | nd. |
| <i>Carabodes labyrinthicus</i> (Michael, 1879)                |                                                        | Eur, Wood, Arb, Mos          | Mac      | Hol  | S   |
| <i>Liacarus coracinus</i> (C.L. Koch, 1841)                   |                                                        | Wood, Gras                   | Pan      | Pal  | nd. |
| <i>Spatiodamaeus verticilipes</i> (Nicolet, 1855)             |                                                        | Wood, Mos                    | nd.      | Hol  | nd. |
| <i>Eupelops plicatus</i> (C.L.<br>Koch, 1836)                 |                                                        | Wood, Arb                    | nd.      | Hol  | S   |
| <i>Nothrus silvestris</i><br>(Nicolet, 1855)                  |                                                        | Eur, Wood                    | Mac, Pan | Cosm | P   |
| <i>Minutozetes pseudofusiger</i> (Schweizer, 1922)            |                                                        | Arb, Mos, Xer                | nd.      | Pal  | nd. |
| <i>Phthiracarus</i> sp. (Perty, 1841)                         |                                                        | -                            | -        | -    | -   |
| <i>Punctoribates hexagonus</i><br>(Berlese, 1908)             |                                                        | Gras, Hal, Tyr               | nd.      | Hol  | nd. |
| <i>Ramusella 2ectina</i><br>(Willmann, 1928)                  |                                                        | Pem, Wood                    | nd.      | Euro | nd. |
| <i>Peloptulus phaenotus</i> (C.<br>L. Koch, 1844)             |                                                        | Gras, Hal, Ree               | nd.      | Pal  | nd. |
| <i>Nanhermannia nana</i> (Nicolet, 1855)                      |                                                        | Wood, Gras, Peb, Hyg         | Mic, Pan | Cosm | P   |
| <i>Adoristes ovatus</i> (C.L.<br>Koch, 1839)                  |                                                        | Eur, Wood, Pem               | Pan      | Hol  | S   |
|                                                               | <i>Ramusella<br/>clavipectinata</i> (Michael,<br>1885) | Hyg, Gras                    | Pan      | Hol  | nd. |
|                                                               | <i>Oppiella subpectinata</i><br>(Oudemans, 1900)       | Eur, Wood,                   | Mic      | Hol  | S   |
|                                                               | <i>Acrogalumna<br/>longipluma</i> (Berlese,<br>1904)   | Eur, Wood,                   | Pan      | Cosm | nd. |
|                                                               | <i>Oribella 2ectinate</i><br>(Michael, 1885)           | Cav, Mne                     | Pan      | Euro | nd. |
|                                                               | <i>Suctobelbella subtrigona</i><br>(Oudemans, 1916)    | Eur, Wood                    | Pan      | Cosm | P   |
|                                                               | <i>Suctobelbella sarekensis</i><br>(Forsslund, 1941)   | Eur, Wood, Gras, Rud,<br>Hyg | Pan      | Hol  | P   |
|                                                               | <i>Autogneta<br/>longilamellata</i><br>(Michael, 1885) | Wood                         | Mic      | Hol  | S   |

|  |                                                       |                          |               |      |     |
|--|-------------------------------------------------------|--------------------------|---------------|------|-----|
|  | <i>Phthiracarus italicus</i><br>(Oudemans, 1906)      | Hyg, Wood, Gras          | Mac           | Euro | S   |
|  | <i>Scheloribates initialis</i><br>(Berlese, 1908)     | Eur                      | Mic, Pan      | Cosm | S   |
|  | <i>Hypochthonius rufulus</i><br>(C.L. Koch, 1835)     | Wood, Gras, Hyg, Pem     | Mic, Pan, Nec | Hol  | P   |
|  | <i>Liebstadia humerata</i><br>(Sellnick, 1928)        | Arb, Mos, Xer            | Pan           | Hol  | S   |
|  | <i>Steganacarus carinatus</i><br>(C.L. Koch, 1841)    | Wood, Xer, Ant           | Mac           | Pal  | S   |
|  | <i>Subiasella quadrimaculata</i> (Evans, 1952)        | Hum                      | nd.           | Pal  | nd. |
|  | <i>Phauloppia rauschenensis</i> (Sellnick, 1908)      | Arb                      | nd.           | Euro | nd. |
|  | <i>Microppia minus</i><br>(Paoli, 1908)               | Eur, Arb, Xer            | Pan           | Cosm | P   |
|  | <i>Carabodes willmani</i><br>(Bernini, 1975)          | Wood, Mos, Lic, Moor     | Mac           | Hol  | S   |
|  | <i>Licneremaeus licnophorus</i> (Michael, 1882)       | Wood, Arb, Mos, Xer      | Mic           | Pal  | S   |
|  | <i>Licnodamaeus pulcherrimus</i> (Paoli, 1908)        | Xer                      | Mac           | Pal  | nd. |
|  | <i>Eueremaeus oblongus</i><br>(C.L. Koch, 1835)       | Wood, Arb, Mos, Xer      | Mic           | Hol  | S   |
|  | <i>Oribatella reticulata</i><br>(Berlese, 1916)       | Wood, Arb, Mos           | nd.           | Hol  | S   |
|  | <i>Carabodes ornatus</i><br>(Štorkán, 1925)           | Wood, Hyg                | Mac, Pan      | Pal  | S   |
|  | <i>Furcoribula furcillata</i><br>(Nordenskiöld, 1901) | Wood, Ant                | Pan           | Hol  | S   |
|  | <i>Metabelba pulverosa</i><br>(Strenzke, 1953)        | Eur, Wood, Mos, Pem, Mes | Mic           | Hol  | S   |
|  | <i>Zetorchestes falzonii</i><br>(Coggi, 1898)         | Wood, Lic, Mos,          | nd.           | Euro | nd. |
|  | <i>Fuscozetes fuscipes</i> (C. L. Koch, 1844)         | Hyg, Gras, Wood, Tyr     | Pan, Nec      | Hol  | nd. |

Weigmann (2006) [95], Schatz (1983) [96], Bernini et al. (1987) [97], Domes-Wehner (2009) [98], Fischer et al. (2010, 2014) [99,100], Weigmann and Schatz (2015) [101], Schatz and Fischer (2016)

[102]; <sup>1</sup>Ant—ant nests; Arb—arboreal; Cav—caves; Eur—eurytopic; Gras—grassland; Hal—halophilic; Hig—highland; Hum—humus-rich soils and compost; Hyg—hygrophilous; Lic—lichens; Mea—meadow; Mes—mesohygrophilous; Mne—mouse nests; Moor—moorland; Mos—mosses; Mpl—mesophilic plant litter; Peb—peat-bog; Pem—peat mosses; Ree—reeds; Rud—ruderal; Tyr—tyrphobiont; Wood—woodland; Xer—xerophilic; <sup>2</sup>Cop—coprophagous; Mac—macrophytophagous; Mic—microphytophagous; Nec—necrophagous; Pan—panphytophagous; <sup>3</sup>Cosm—cosmopolitan; Euro—European; Hol—Holarctic; Pal—Palearctic; <sup>4</sup>P—parthenogenetic, S—sexual; <sup>5</sup>nd.—no data.
